# Supplementary material for: Transcription-Associated R-Loop Formation across the Human FMR1 CGG-Repeat Region
Source: PubMed Central journal article supplement (PMC3990486; doi:10.1371/journal.pgen.1004294), 2014-04-17

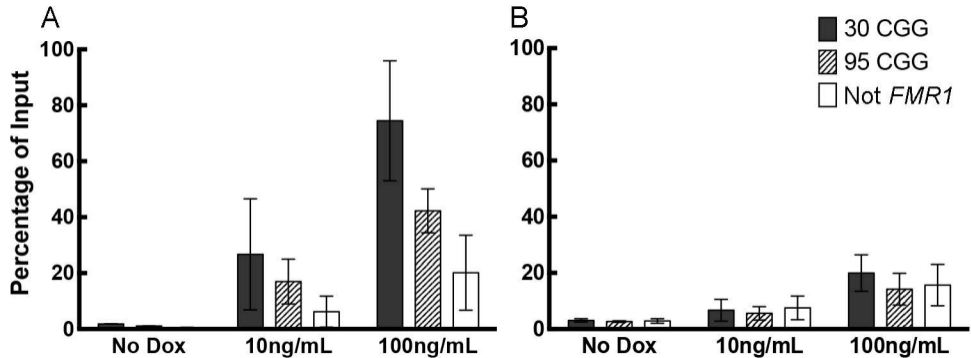

Supplement: pgen.1004294.s002.pdf [file pgen.1004294.s002.pdf]
