# Supplementary material for: Transcription-Associated R-Loop Formation across the Human FMR1 CGG-Repeat Region
Source: PubMed Central journal article supplement (PMC3990486; doi:10.1371/journal.pgen.1004294), 2014-04-17

*FMR1* relative to *MYADM*

Fold enrichment

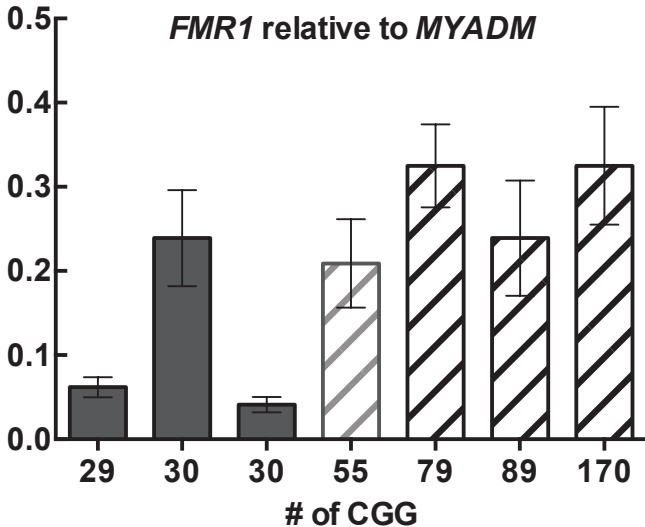

Supplement: pgen.1004294.s003.pdf [file pgen.1004294.s003.pdf]
